# Supplementary material for: High Prognostic Value of 68Ga-PSMA PET/CT in Renal Cell Carcinoma and Association with PSMA Expression Assessed by Immunohistochemistry
Source: MDPI journal article supplement (doi:10.3390/diagnostics13193082), 2023-09-28
Supplement: s1 [file s1]

## SUPPLEMENTARY MATERIAL

**Table S1.** Tumor characteristics at initial diagnosis.

|                             |                   |
|-----------------------------|-------------------|
| No. T grade (%)             |                   |
| 1                           | 5 (19.2)          |
| 2                           | 5 (19.2)          |
| 3                           | 15 (57.7)         |
| 4                           | 1 (3.8)           |
| No. T stage (%)             |                   |
| 1                           | 5, T1a 4, T1b 1   |
| 2                           | 5, T2a 4, T2b 1   |
| 3                           | 15, T3a 13, T3b 2 |
| 4                           | 1                 |
| No. pN category (%)         |                   |
| N+                          | 2 (7.7)           |
| Nx                          | 3 (11.5)          |
| No. clinical M category (%) |                   |
| M0                          | 4 (15.4)          |
| M1 synchronic               | 5 (19.2)          |
| M1 metachronic              | 16 (61.5)         |

**Table S2.** Site and uptake (SUVmax) of the target lesion in the enrolled patients with positive PSMA-PET.

| Patient | Site of the target lesion | SUVmax |
|---------|---------------------------|--------|
| 1       | Liver (S2)                | 48.36  |
| 2       | Left sacrum               | 46.37  |
| 3       | Mediastinal node          | 35.44  |
| 4       | Lumbar-aortic mass        | 66.6   |
| 5       | Renal fossa               | 114.57 |
| 6       | Sacrum                    | 24.03  |
| 7       | Ilium                     | 10.2   |
| 8       | Right adrenal gland       | 9.63   |
| 9       | Renal fossa               | 7.4    |
| 10      | Lung parenchima           | 7.4    |
| 11      | Lung parenchima           | 8.17   |
| 12      | Lung parenchima           | 24.94  |

|    |              |       |
|----|--------------|-------|
| 13 | Right kidney | 9.96  |
| 14 | Right kidney | 54.25 |
| 15 | Left kidney  | 5.45  |
|    |              | 5.45  |

| Patient | Site of the target lesion | SUVmax |
|---------|---------------------------|--------|
| 1       | Liver (S2)                | 48.36  |
| 2       | Left sacrum               | 46.37  |
| 3       | Mediastinal node          | 35.44  |
| 4       | Lumbar-aortic mass        | 66.6   |
| 5       | Renal fossa               | 114.57 |
| 6       | Sacrum                    | 24.03  |
| 7       | Ilium                     | 10.2   |
| 8       | Right adrenal gland       | 9.63   |
| 9       | Renal fossa               | 7.4    |
| 10      | Lung parenchima           | 7.4    |
| 11      | Lung parenchima           | 8.17   |
| 12      | Lung parenchima           | 24.94  |
| 13      | Right kidney              | 9.96   |
| 14      | Right kidney              | 54.25  |
| 15      | Left kidney               | 5.45   |
|         |                           | 5.45   |

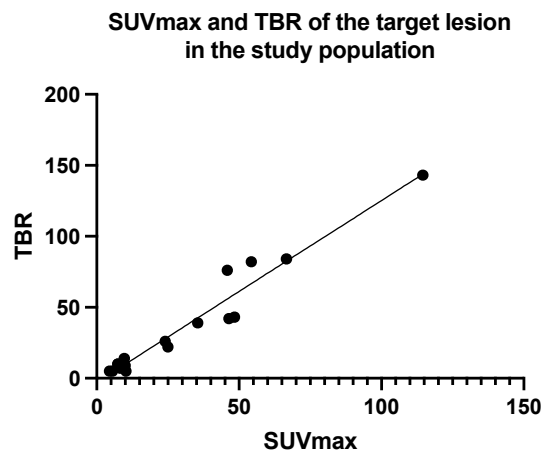

**Figure S1.** Behavior of SUVmax and TBR of the target lesion in subjects with positive PSMA-PET/CT
